# Supplementary material for: Impact and economic analysis of human T-cell lymphotropic virus type 1 (HTLV-1)-targeted antenatal screening, England and Wales, 2021
Source: PubMed Central journal article supplement (PMC11141129; doi:10.2807/1560-7917.es.2024.29.22.2300537), 2024-05-30
Supplement: 23-00537_ROSADAS_Supplement.pdf [file 23-00537_ROSADAS_Supplement.pdf]

## Impact and economic analysis of human T-cell lymphotropic virus type 1 (HTLV-1)-targeted antenatal screening, England and Wales, 2021

Carolina Rosadas\*, Milene Costa, Kátia Senna, Marisa Santos, Graham P Taylor

**Disclaimer:** This supplementary material is hosted by Eurosurveillance as supporting information alongside the article "Impact and economic analysis of HTLV-1 targeted antenatal screening in England and Wales", on behalf of the authors, who remain responsible for the accuracy and appropriateness of the content. The same standards for ethics, copyright, attributions and permissions as for the article apply. Supplements are not edited by Eurosurveillance and the journal is not responsible for the maintenance of any links or email addresses provided therein.

**Supplementary Table S1.** Prevalence of infections and diseases or syndromes that are screened for in the antenatal and neonatal care in the United Kingdom, in 2024 compared with HTLV-1 infection.

| Infection or disease/syndrome                          | Positive tests | Number tested | Prevalence per 10,000 | 95% CI |
|--------------------------------------------------------|----------------|---------------|-----------------------|--------|
| <i>HTLV-1 (parents born in the Caribbean)</i>          | NA             |               | 169.0                 | 92–283 |
| Hepatitis B                                            | 2,214          | 642,448       | 34.5                  | 33–36  |
| <i>HTLV-1 (parents born in other endemic area)</i>     | NA             |               | 32.0                  | 15–59  |
| Down's syndrome                                        | NA             |               | 26.5                  | 25–28  |
| Syphilis                                               | 1,019          | 642,433       | 15.9                  | 15–17  |
| HIV                                                    | 621            | 642,434       | 9.7                   | 9–10   |
| Congenital hypothyroidism                              | 443            | 591,851       | 7.5                   | 7–8    |
| Edward's' syndrome                                     | NA             |               | 7.4                   | 7–8    |
| Sickle cell disease (newborns tested)                  | 227            | 589,542       | 3.9                   | NA     |
| <i>HTLV-1 (overall prevalence in the UK)</i>           | NA             |               | 3.1                   | 2–54   |
| Cystic fibrosis                                        | 165            | 593,581       | 2.8                   | 2–3    |
| Patau's syndrome                                       | NA             |               | 2.7                   | 2–3    |
| Phenylketonuria (PKU)                                  | 69             | 591,947       | 1.2                   | 0–1    |
| Medium-chain acyl-CoA dehydrogenase deficiency (MCADD) | 40             | 591,946       | 0.7                   | 0–1    |
| Isovaleric acidaemia (IVA)                             | 21             | 591,946       | 0.4                   | NA     |
| Maple syrup urine disease (MSUD)                       | 3              | 591,946       | 0.1                   | 0–1    |
| Glutaric aciduria type 1 (GA1)                         | 3              | 591,947       | 0.1                   | NA     |
| Homocystinuria (HCU)                                   | 1              | 591,946       | 0.02                  | NA     |

CI: Confidence Interval, HTLV-1: Human T cell lymphotropic virus type 1, NA: Not available, UK: United Kingdom.

References:

Ades AE, Parker S, Walker J, Edginton M, Taylor GP, Weber JN. Human T cell leukaemia/lymphoma virus infection in pregnant women in the United Kingdom: population study. *BMJ*. 2000;320(7248):1497-501.

<http://dx.doi.org/10.1136/bmj.320.7248.1497> PMID:10834889

Office for Health Improvement and Disparities. NHS Fetal Anomaly Screening Programme (FASP). NHS screening programmes in England: 2020 to 2021. London: gov.uk. [Accessed: 17 May 2024]. Available from:

<https://www.gov.uk/government/publications/nhs-screening-programmes-annual-report/nhs-screening-programmes-in-england-2020-to-2021#nhs-fetal-anomaly-screening-programme-fasp>

National Health Service (NHS). NCARDRS Congenital Anomaly Official Statistics Report, 2020. London: NHS England; 2022. Available from: <https://digital.nhs.uk/data-and-information/publications/statistical/ncardrs-congenital-anomaly-statistics-annual-data/ncardrs-congenital-anomaly-statistics-report-2020/prevalence-t21-t18-t13#top>

National Screening Committee. Antenatal screening programme: HTLV. London: gov.uk; 2022. Available from: <https://view-health-screening-recommendations.service.gov.uk/htlv>

**Supplementary Table S2.** Live births in England and Wales (2021) from parents born in HTLV-1 endemic areas.

| Live births England and Wales, 2021                                               |                |
|-----------------------------------------------------------------------------------|----------------|
| <b>Country of birth of mothers (high prevalence of HTLV-1)</b>                    |                |
| Western Africa                                                                    | 10,487         |
| Central Africa                                                                    | 1,838          |
| Southern Africa                                                                   | 3,018          |
| Central America                                                                   | 494            |
| South America                                                                     | 4,238          |
| Caribbean                                                                         | 2,124          |
| Middle East                                                                       | 8,676          |
| India                                                                             | 15,260         |
| Pakistan                                                                          | 15,791         |
| Romania                                                                           | 15,894         |
| <b>Total</b>                                                                      | <b>77,820</b>  |
| <b>Country of birth of fathers (partners of mothers from low prevalence area)</b> |                |
| Western Africa                                                                    | 3712           |
| Central Africa                                                                    | 600            |
| Southern Africa                                                                   | 2149           |
| Central America                                                                   | 191            |
| South America                                                                     | 1180           |
| Caribbean                                                                         | 1956           |
| Middle East                                                                       | 3093           |
| India                                                                             | 2010           |
| Pakistan                                                                          | 6285           |
| <b>Total</b>                                                                      | <b>21,176</b>  |
| <b>Total to be screened</b>                                                       | <b>98,996</b>  |
| <b>Total number of pregnant women England and Wales (2021)</b>                    | <b>624,628</b> |

**Supplementary Table S3.** Live births (numbers and percentages) for the ten most common countries of birth of mother for non-UK-born mothers, England and Wales in 2021

Ref: [Parents' country of birth - Office for National Statistics \(ons.gov.uk\)](https://www.ons.gov.uk)

| Country of birth of mother | 2021 Rank | 2021 Number |
|----------------------------|-----------|-------------|
| Romania                    | 1         | 15,894      |
| Pakistan                   | 2         | 15,791      |
| India                      | 3         | 15,260      |
| Poland                     | 4         | 13,373      |
| Bangladesh                 | 5         | 6,790       |
| Nigeria                    | 6         | 5,907       |
| Germany                    | 7         | 3,511       |
| Lithuania                  | 8         | 3,499       |
| United States of America   | 9         | 3,446       |
| Albania                    | 10        | 3,260       |

**Supplementary Table S4.** High HTLV prevalence countries according to ECDC report  
Geographical distribution of areas with a high prevalence of HTLV-1 infection (2015)

**America**

Argentina  
Barbados  
Brazil  
Chile  
Colombia  
Dominican Republic  
French Guyana (France)  
Guadeloupe (France)  
Guyana  
Haiti  
Jamaica  
Martinique (France)  
Panama  
Peru  
Suriname  
Trinidad and Tobago  
Venezuela

**Europe**

Romania

**Africa**

Benin  
Burkina Faso  
Cameroon  
Central African Republic  
Chad  
Congo  
Cote d'Ivoire  
Democratic Republic of the  
Congo  
Equatorial Guinea  
Gabon  
Gambia  
Ghana  
Guinea  
Guinea-Bissau  
Liberia  
Mali  
Mauritania  
Mozambique  
Nigeria  
Senegal  
Seychelles  
Sierra Leone  
South Africa  
Togo

**Arabian Peninsula and Asia**

Iran  
Japan  
Taiwan

**Supplementary Table S5.** HTLV-1 prevalence in pregnant women in the UK according to the country of origin:

Reference: [Ades et al 2000](#).

|                   | Anti-HTLV antibody |                       |
|-------------------|--------------------|-----------------------|
|                   | Total tested       | Prevalence (per 1000) |
| <b>Africa</b>     |                    |                       |
| Western           | 2325               | 3-3.4                 |
| Central           | 559                | 3.65                  |
| Rest of Africa    | 4250               | 0                     |
| <b>America</b>    |                    |                       |
| Caribbean         | 914                | 16.4-17.5             |
| South             | 490                | 2                     |
| Central and North | 801                | 0                     |
| <b>Asia</b>       |                    |                       |
| Japan             | 233                | 4.3                   |
| Rest of Asia      | 12590              | 0                     |
| <b>Europe</b>     |                    |                       |
| UK                | 69013              | 0.33-0.38             |
| Other Northern    | 1948               | 0                     |
| Southern          | 1143               | 0                     |
| Eastern           | 494                | 0                     |
| Western           | 1204               | 0.8                   |
| Oceania           | 529                | 0                     |

## Supplementary Table S6. Life Table UK

Reference: [Office for National Statistics accessed 09 May 2023](#)

\*Average  $q_x$  (i.e the mortality rate between age  $x$  and  $(x + 1)$ , that is the probability that a person aged  $x$  exact will die before reaching age  $(x + 1)$ ) for male and female was calculated.

| age | $q_x$     | age | $q_x$     | age | $q_x$     |
|-----|-----------|-----|-----------|-----|-----------|
| 0   | 0.0038635 | 33  | 0.000725  | 67  | 0.012168  |
| 1   | 0.0002215 | 34  | 0.000787  | 68  | 0.013475  |
| 2   | 0.0001205 | 35  | 0.000846  | 69  | 0.0147035 |
| 3   | 0.0000985 | 36  | 0.0009165 | 70  | 0.0160665 |
| 4   | 0.000075  | 37  | 0.001056  | 71  | 0.017216  |
| 5   | 0.000074  | 38  | 0.0010545 | 72  | 0.0191405 |
| 6   | 0.000078  | 39  | 0.0011625 | 73  | 0.021544  |
| 7   | 0.000061  | 40  | 0.001265  | 74  | 0.024232  |
| 8   | 0.0000635 | 41  | 0.001352  | 75  | 0.027033  |
| 9   | 0.0000555 | 42  | 0.001475  | 76  | 0.0300635 |
| 10  | 0.000072  | 43  | 0.001627  | 77  | 0.034027  |
| 11  | 0.000066  | 44  | 0.0017775 | 78  | 0.038304  |
| 12  | 0.0000795 | 45  | 0.0019755 | 79  | 0.042986  |
| 13  | 0.0001015 | 46  | 0.0021355 | 80  | 0.047877  |
| 14  | 0.0001125 | 47  | 0.0022435 | 81  | 0.0535785 |
| 15  | 0.0001425 | 48  | 0.002463  | 82  | 0.059697  |
| 16  | 0.000168  | 49  | 0.002674  | 83  | 0.0673205 |
| 17  | 0.0002345 | 50  | 0.0029055 | 84  | 0.076219  |
| 18  | 0.00031   | 51  | 0.0031365 | 85  | 0.085612  |
| 19  | 0.000333  | 52  | 0.003328  | 86  | 0.0973705 |
| 20  | 0.000356  | 53  | 0.003583  | 87  | 0.109363  |
| 21  | 0.000359  | 54  | 0.003842  | 88  | 0.122726  |
| 22  | 0.000371  | 55  | 0.0041645 | 89  | 0.138061  |
| 23  | 0.0003695 | 56  | 0.004615  | 90  | 0.1499775 |
| 24  | 0.0003895 | 57  | 0.004994  | 91  | 0.1683815 |
| 25  | 0.0004305 | 58  | 0.005531  | 92  | 0.1859475 |
| 26  | 0.000432  | 59  | 0.005973  | 93  | 0.2062745 |
| 27  | 0.0004695 | 60  | 0.0065795 | 94  | 0.226238  |
| 28  | 0.0004975 | 61  | 0.007136  | 95  | 0.249589  |
| 29  | 0.000533  | 62  | 0.008026  | 96  | 0.2718325 |
| 30  | 0.000579  | 63  | 0.008685  | 97  | 0.2959945 |
| 31  | 0.0006145 | 64  | 0.009275  | 98  | 0.317578  |
| 32  | 0.000663  | 65  | 0.0102865 | 99  | 0.344926  |
|     |           | 66  | 0.0113115 | 100 | 0.370624  |

## Detailed information of inputs used in the model

### Incidence of breastfeeding in the UK

Asian (95%), Black (96%), or Chinese or other ethnic origin (97%) ,mixed race (89%), White (79%).

### [Breastfeeding rates UK](#)

[https://sp.ukdataservice.ac.uk/doc/7281/mrdoc/pdf/7281\\_ifs-uk-2010\\_report.pdf](https://sp.ukdataservice.ac.uk/doc/7281/mrdoc/pdf/7281_ifs-uk-2010_report.pdf)

**Cost of screening test:** £1.4 per test

\*Based on quote for Murex anti-HTLV-1/2 ELISA £670 for 480 tests.

**Cost of Western blot: £ 19.75 each**

\* Based on quote for HTLV Blot 2.4 £711 for 36 tests

### Cost of formula up to 6 months

The cost of 800g formula powder is £9.9 (Sainsbury 10/05/2023) and £10.5 (Tesco 10/05/2023). In Brazil the recommendation is 66-77 formula for a baby up to 6 months (Portaria RN).

This results in a total cost of respectively £653.4 - £762.3 or £693 - £808.5

<https://static1.squarespace.com/static/5efa4a95af311446a53c8cab/t/5fd0990c5347e801a823f769/1607>

### Cost of formula up to 12 months

Initial 66-77 formula up to 6 months followed by 72 (12 units x 6 months, introduction solid foods) = 138-149 units.

Total cost is £1,366.2 - £1,475.1 or £1,449 - £1,564.5

### Cost of formula 3-6months

36-42 units of Formula £356.4 - 415.8 and £378 - 441

### Cost of formula 3-12months

36-42 +72 equates to 108-114 £1069.2- 1128.6 or £ 1134 - 1197

### Cost of Cabergoline

1mg tablets: 20 units costs 6425 p

1 tablet = 321.25 = 3.22 pounds



Ref: [NHS Electronic Drug Tariff](#) accessed in 12th May 2023

**Breastfeeding incidence:**

96% Black Caribbean [NHS Digital. Infant Feeding Survey – UK, 2010.](#)

**Breastfeeding prevalence at 6 months:**

61% Black Caribbean [NHS Digital. Infant Feeding Survey – UK, 2010.](#)

**Utility values in the UK**

Asymptomatic infection (Mean (SD)): 0.7802 (0.209) [Rosadas et al 2020](#)

HAM (Mean (SD)): 0.2025 (0.297) [Rosadas et al 2020](#)

Utility values people in the UK: 0.91 [Janssen et al 2018](#)

**Annual Cost of Treating HTLV-1 Asymptomatic patient**

£2900 (Imperial College Healthcare NHS Trust Resource Group)

**Annual Cost of Treating HTLV-1 Associated Myelopathy (HAM)**

£16000 (Imperial College Healthcare NHS Trust Resource Group)

**Annual Cost of Treating Adult T cell Leukaemia**

\*Annual Cost of Treating Aggressive ATLL

£18016 (Imperial College Healthcare NHS Trust Resource Group)

\*Annual Cost of Treating Indolent ATLL

£12907 (Imperial College Healthcare NHS Trust Resource Group)

75% Aggressive + 25% Indolent =  $13512 + 3226.75 = £16,739$
